# Supplementary material for: Antiviral Potential of Plants against COVID-19 during Outbreaks—An Update
Source: MDPI journal article supplement (doi:10.3390/ijms232113564), 2022-11-05
Supplement: s1 [file s1]

**Table S1.** Antiviral potential of Medicinal Plants

| Common name<br>(Traditional Asian) | Botanical name & parts of the plant                 | Chemical constituents                                                                                                                                             | Effective in Viral disease                                                 | Reference |
|------------------------------------|-----------------------------------------------------|-------------------------------------------------------------------------------------------------------------------------------------------------------------------|----------------------------------------------------------------------------|-----------|
| Lahsun                             | <i>Allium cepa</i> , bulb                           | Allicin, E/Z-ajoene, Allin, Diallyl disulfide, Diallyl trisulfide, pyrogallol, protocatechuic acid, Quercetin, gallic acid.                                       | COVID19, Influenza virus                                                   | [41]      |
| Kali mirch                         | <i>Piper longum</i> , fruits                        | $\alpha$ -pinene, $\beta$ -pinene, limonene, myrcene, sabinene, camphene, $\alpha$ -tujone, piperitone, caryophyllene, p-cymene, $\alpha$ -terpinene, piperamide. | Coxsackie virus type-3 (CVB3),                                             | [44]      |
| Haldi                              | <i>Curcuma longa</i> , rhizome                      | Curcumin, curcumenone, bisacumol, bisacurone, Curcumenol, curcumadiol, demethoxycurcumin.                                                                         | COVID19, Zika virus, Chickungunya virus, vesicular stomatitis virus        | [46]      |
| Clove pink                         | <i>Dianthus caryophyllus</i> , root, flower         | Dianthin30, dianthin32, dianthramides, flavonoid                                                                                                                  | COVID19, Herpes simplex virus-I (HSV-I), Hepatitis-A Virus-27 (HSV-27)     | [44-45]   |
| Laung                              | <i>Syzygium aromaticum</i> , flowering buds         | Eugenol, acetyl eugenol, $\beta$ -caryophyllene, vanillin, eugenin, kaempferol, Rhamnetin, eugenitin                                                              | COVID19, Herpes simplex virus-I, Herpes simplex virus-2, Hepatitis C virus | [47]      |
| Adrak                              | <i>Ginger officinalis</i> , rhizome                 | 6-Gingerol, 6-Shogaol, 6-Paradol, Zingerol, Gingerol.                                                                                                             | COVID19, Human respiratory syncytial virus (HSRV)                          | [51]      |
| Garden Rhubarb                     | <i>Rheum rhabarbarum</i> , whole plant              | Emodin                                                                                                                                                            | SARS-CoV                                                                   | [52]      |
| Dalchini                           | <i>Cinnamomum zeylanicum</i> , bark                 | Cinnamaldehyde, Eugenol, cinnamic acid, cinnamyl acetate, cinnamyl alcohol, Thujene                                                                               | Immunostimulatory action                                                   | [53]      |
| Pokeweed                           | <i>Phytolacca Americana</i> , root, Brries & leaves | Phytolaccoside-A, B Phytolacca saponine-B, Phytolaccagenic acid, pokeberrygenin, hederogenin                                                                      | HIV-I, Human T-cell Leukemia virus                                         | [54]      |
| Four o'clock flower                | <i>Mirabilis jalapa</i> , whole plant               | 4-hydroxycoumarin, Mirabijalone A-D, 9-o-methyl-4-hydroxyboeravinone B, Campesterol                                                                               | HIV-I                                                                      | [55]      |

|                                    |                                            |                                                                                                         |                                                                                                                                                                |                                    |
|------------------------------------|--------------------------------------------|---------------------------------------------------------------------------------------------------------|----------------------------------------------------------------------------------------------------------------------------------------------------------------|------------------------------------|
| Green tea                          | <i>Camellia sinensis, leaves</i>           | (-)-epigallocatechin gallate,(-)-epigallocatechin, (-)-epicatechingallate, (-)-epicatechin,(+)-catechin | COVID19                                                                                                                                                        | [51,56,57]                         |
| Chaihu                             | <i>Radix Bupleuri, roots</i>               | Saikosaponins A, B <sub>2</sub> ,C and d                                                                | HCoV-22E9                                                                                                                                                      | [67,73,74]                         |
| Liquorice root                     | <i>Glycyrrhiza glabra, roots</i>           | Glycyrrhizin<br>Glycyrrhizic acid                                                                       | SARSr virus                                                                                                                                                    | [68,75]                            |
| Chinese skullcap                   | <i>Radix Scutellaria</i>                   | Baicalin                                                                                                | SARS-CoV                                                                                                                                                       | [76-77]                            |
| Fish mint                          | <i>Houttuynia cordata, leaves</i>          | Cinanserin                                                                                              | 3CLpro inhibitors of SARS-CoV, covid-19                                                                                                                        | [78-79]                            |
| Japanese alder                     | <i>Alnus japonica,stem bark, root</i>      | Diarylheptanoids                                                                                        | PLP inhibitors of SARS-CoV                                                                                                                                     | [80,81,82]                         |
|                                    |                                            |                                                                                                         |                                                                                                                                                                |                                    |
| Tobacco                            | <i>Nicotiana tabacum, leaves</i>           | Nicotianamine                                                                                           | ACE-2 inhibitor in SRAS-CoV                                                                                                                                    | [85]                               |
| Citrus fruit                       | <i>Citrus sinensis, fruits</i>             | Naringenin                                                                                              | Inhibits Mpro of SARS-CoV                                                                                                                                      | 10.1016/j.jsps.2022.02.014[51]     |
| olive                              | <i>Olea Europaea, fruits</i>               | Apigenine-7-glucoside, Oleuropein                                                                       | Inhibits Mpro of SARS-CoV                                                                                                                                      | 10.1080/21655979.2022.2027181 [51] |
| Chili pepper                       | <i>Capsicum annum, fruits</i>              | Quercetin, Luteoline-7-glucoside                                                                        | SARS-CoV                                                                                                                                                       | [69-70]                            |
| Boswellia                          | <i>Extract</i>                             |                                                                                                         | Viral infection                                                                                                                                                | [72]                               |
| Isobavachalcone,                   | <i>Rhoifolin Pectolarin</i>                | Quercetin 3-β-d glucoside, Helichrysetin                                                                | SARS-CoV                                                                                                                                                       | [60-70;102]                        |
| <b>Nutritional element</b>         |                                            |                                                                                                         |                                                                                                                                                                |                                    |
| <b>Name</b>                        | <b>Dietary/Other source</b>                | <b>Benefits offered</b>                                                                                 | <b>Effective in Viral disease</b>                                                                                                                              | <b>Ref</b>                         |
| Vitamin C                          | Amla, Lemon, Oranges                       | An immune booster                                                                                       | Antiviral, Anticancer                                                                                                                                          | [51-52]                            |
| Vitamin D                          | Soy milk, Beef Liver, Cheese, Egg Yolks    | Raise the resistance level                                                                              | Antiviral,COVID-19                                                                                                                                             | [153.154]                          |
| Vitamin E                          | Soybean oil, Wheat Germ oil, Rice Germ oil | Reduce oxidative stress                                                                                 | Antiviral, Anticancer                                                                                                                                          | [153.154]                          |
| Vitamin A                          | Carrot, Spinach, Papaya, Mango             | Raise innate immunity                                                                                   | Antiviral, Anticancer                                                                                                                                          | 155,156,151                        |
| Omega-3-polyunsaturated fatty acid | Cereals, vegetables, and nuts              | Raise the levels of prostaglandin/leukotriene/proteine                                                  | Omega-3-polyunsaturated fatty acid which is commonly found in Cereals, vegetables, and nuts has been reported to raise the levels of prostaglandin/leukotriene | [153.154]                          |

|          |                                                        |                                                                           |                                                                                 |           |
|----------|--------------------------------------------------------|---------------------------------------------------------------------------|---------------------------------------------------------------------------------|-----------|
|          |                                                        |                                                                           | /protectine in iAntiviral,<br>Anticancer protective<br>wayAntiviral, Anticancer |           |
| Zinc     | mushrooms,<br>spinach, broccoli,<br>kale, and garlic   | Raise the level of humoral &<br>cell mediated immunity                    | Antiviral, Anticancer                                                           | [151,159] |
| Selenium | Cereals ,Jaggery,<br>Ragi                              | Increases the host immune<br>system                                       | Antiviral, Anticancer                                                           | [151,160] |
| Iron     | Legumes, Cereals,<br>Green leafy<br>vegetables, Fruits | Prevents development of<br>recurrent acute respiratory<br>tract infection | Antiviral, Anticancer                                                           | [161-162] |
